# Supplementary material for: Detection of biomarkers related to the diagnosis and prognosis of breast cancer through the combination of gene expression profiling and DNA methylation
Source: Research Square preprint supplement (doi:10.21203/rs.3.rs-1516257/v1), 2022-04-13
Supplement: Supplementary file 1 [file f61ed51afd173e448fc9aa77.docx]

**Table 1:** Hypermethylated and low expressed or hypomethylated and highly expressed loci in the 5 filtered *database*

|  | Gene_Symbol | TCGAexpression | GSE20944  expression | GSE109169  expression | TCGA methylation | GSE59901methylation | GSE141338methylation |
| --- | --- | --- | --- | --- | --- | --- | --- |
| cg22531371 | MUC1 | High | high | high | Low | Low | Low |
| cg22500132 | MUC1 | High | high | high | Low | Low | Low |
| cg02386822 | MUC1 | High | high | high | Low | Low | Low |
| cg19264571 | APCDD1 | Low | low | low | high | High | High |
| cg27409154 | IGFBP6 | Low | low | low | high | High | High |
| cg06559575 | IGFBP6 | Low | low | low | high | High | High |
| cg24996758 | [H2BC5](https://www.ncbi.nlm.nih.gov/gene/3017) | High | high | high | Low | Low | Low |
| cg24141382 | CTPS1 | High | high | high | Low | Low | Low |
| cg02025583 | TMEM220 | Low | low | low | high | High | High |
| cg22953017 | AOX1 | Low | low | low | high | High | High |
| cg25327343 | MAL2 | High | high | high | Low | Low | Low |
| cg21253043 | GALNT6 | High | high | high | Low | Low | Low |
| cg10119075 | ITIH5 | Low | low | low | high | High | High |
| cg00840332 | LEP | Low | low | low | high | High | High |
| cg06825512 | APCDD1 | Low | low | low | high | High | High |
| cg23841186 | IGFBP6 | Low | low | low | high | High | High |
| cg01407062 | PRC1 | High | high | high | Low | Low | Low |
| cg26814075 | LEP | Low | low | low | high | High | High |
| cg22369786 | SPRY2 | Low | low | low | high | High | High |
| cg13870494 | MAMDC2 | Low | low | low | high | High | High |
| cg15374435 | SPRY2 | Low | low | low | high | High | High |
| cg23891273 | MYBPC1 | Low | low | low | high | High | High |
| cg13434308 | TMTC1 | Low | low | low | high | High | High |
| cg01135780 | EBF1 | Low | low | low | high | High | High |
| cg18607411 | SPRY2 | Low | low | low | high | High | High |
| cg17265829 | FAT4 | Low | low | low | high | High | High |
| cg02372889 | HSPB6 | Low | low | low | high | High | High |
| cg03790250 | SLIT2 | Low | low | low | high | High | High |
| cg23901852 | FAT4 | Low | low | low | high | High | High |
| cg00251610 | EBF1 | Low | low | low | high | High | High |
| cg16126280 | EBF1 | Low | low | low | high | High | High |
